# Supplementary material
Source: PubMed Central journal article supplement (PMC2831994)

## Supplemental Material

Psaty BM. Drug therapies for the primary prevention of cardiovascular events: 2009 Ansel Keys Memorial Lecture. *Circulation*.

### Supplemental figure legends

Supplemental figure 1. Reproduced with permission from Figure 1. Distribution curves of serum cholesterol levels in South Japan and East Finland from Keys' Seven Countries Study. Rose G. Ansel Keys Lecture. *Circulation* 1991; 84: 1405-9.

Supplemental figure 2. Reproduced with permission from Figure 3. Percentage distribution of serum cholesterol levels (mg/dl) in men aged 50-62 who did or did not subsequently develop coronary heart disease (Framingham Study). Rose G. Sick individuals and sick populations. *Int J Epidemiol* 1985; 14(1): 32-38 by permission of Oxford University Press.

Supplemental figure 1.

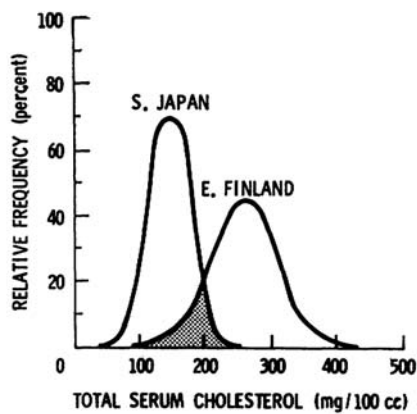

Supplemental figure 2.

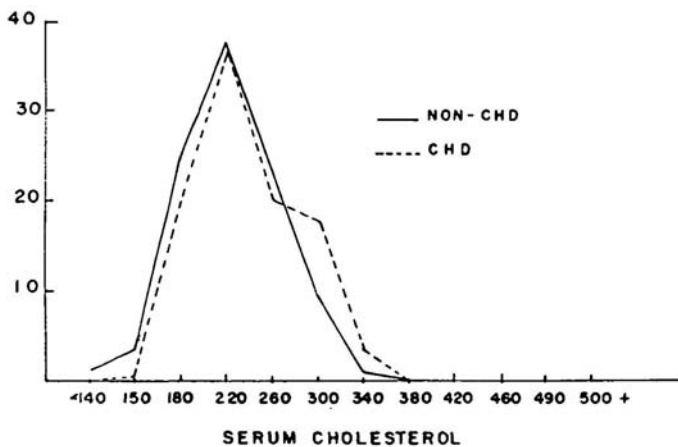

Supplement: NIHMS181049-supplement-Supp1.pdf [file NIHMS181049-supplement-Supp1.pdf]
